# Supplementary material for: Dual-function silver nanoparticles catalyst supported on ZnO nanoparticles from plant extract: high-TOF hydrogen generation and fast photocatalytic tetracycline removal
Source: Royal Society of Chemistry journal article supplement (doi:10.1039/d5ra09874b), 2026-04-01
Supplement: d5ra09874b1.pdf [file d5ra09874b1.pdf]

**Dual-Functional Silver Nanoparticles Supported on ZnO Nanoparticles Catalyst from Plant  
Extract: High-TOF Hydrogen Generation and Fast Photocatalytic Tetracycline Removal**

*Sayyar Ali Shah<sup>a</sup>, Shah Faisal Mohammad<sup>a</sup>, Abida Batool<sup>b</sup>, Muhammad Saad Riaz<sup>c</sup>, Azhar  
Abbas<sup>c,d,\*</sup>, Shoaib Akhtar<sup>c,\*</sup>, Ibrahim A. Shaaban<sup>e</sup>, Umar Nishan<sup>f</sup>, Hanbing Song<sup>a</sup>,*

*<sup>a</sup>School of Medical Science, Shandong Xiehe University, Jinan, Shandong Province, P.R.China*

*<sup>b</sup>Department of Chemistry, Superior University Lahore, Lahore 54000, Pakistan*

*<sup>c</sup>Institute of Chemistry, University of Sargodha, Sargodha 40100, Pakistan*

*<sup>d</sup>Government Ambala Muslim Graduate College, Sargodha 40100, Pakistan*

*<sup>e</sup>Department of Chemistry, Faculty of Science, Research Center for Advanced Materials Science  
(RCAMS), King Khalid University, P.O. Box 960, Abha, 61421, Saudi Arabia.*

*<sup>f</sup>Department of Chemistry, Kohat University of Science and Technology, Kohat 26000 KP Pakistan*

*\* Corresponding authors:*

*Dr Azhar Abbas: Govt. Ambala Muslim Graduate College, Sargodha, 40100, Pakistan;*

*<https://orcid.org/0000-0002-5741-7136>: Email: [azhar.ramzan@uos.edu.pk](mailto:azhar.ramzan@uos.edu.pk)*

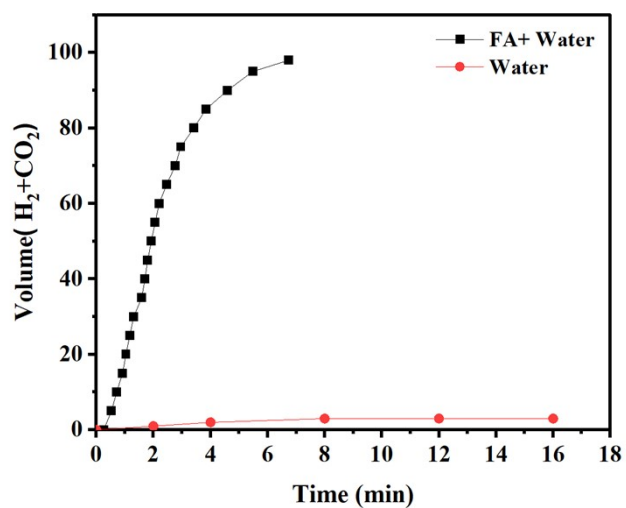

**Fig. S1.** The plot of Volume of gases evolved (CO<sub>2</sub> + H<sub>2</sub>) vs time

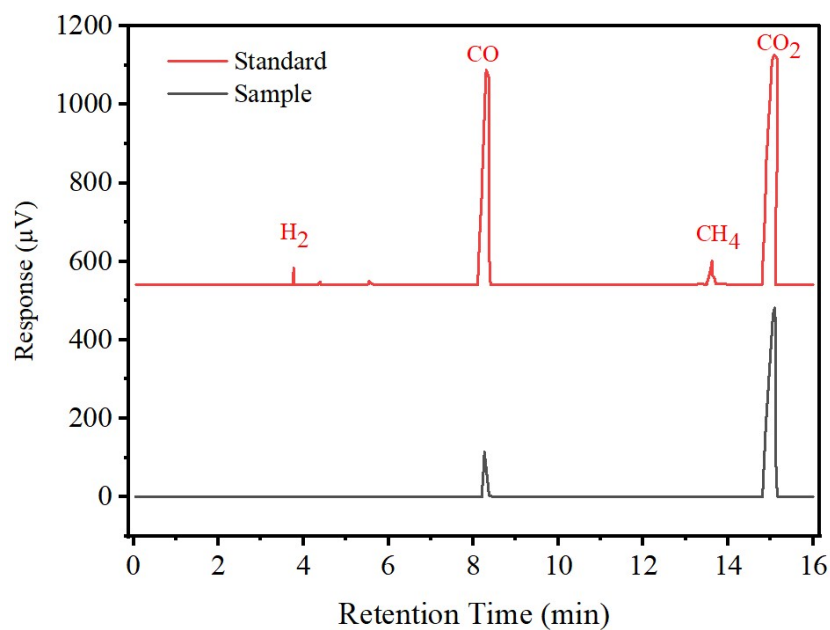

**Fig. S2.** GCTD analysis of evolved gases

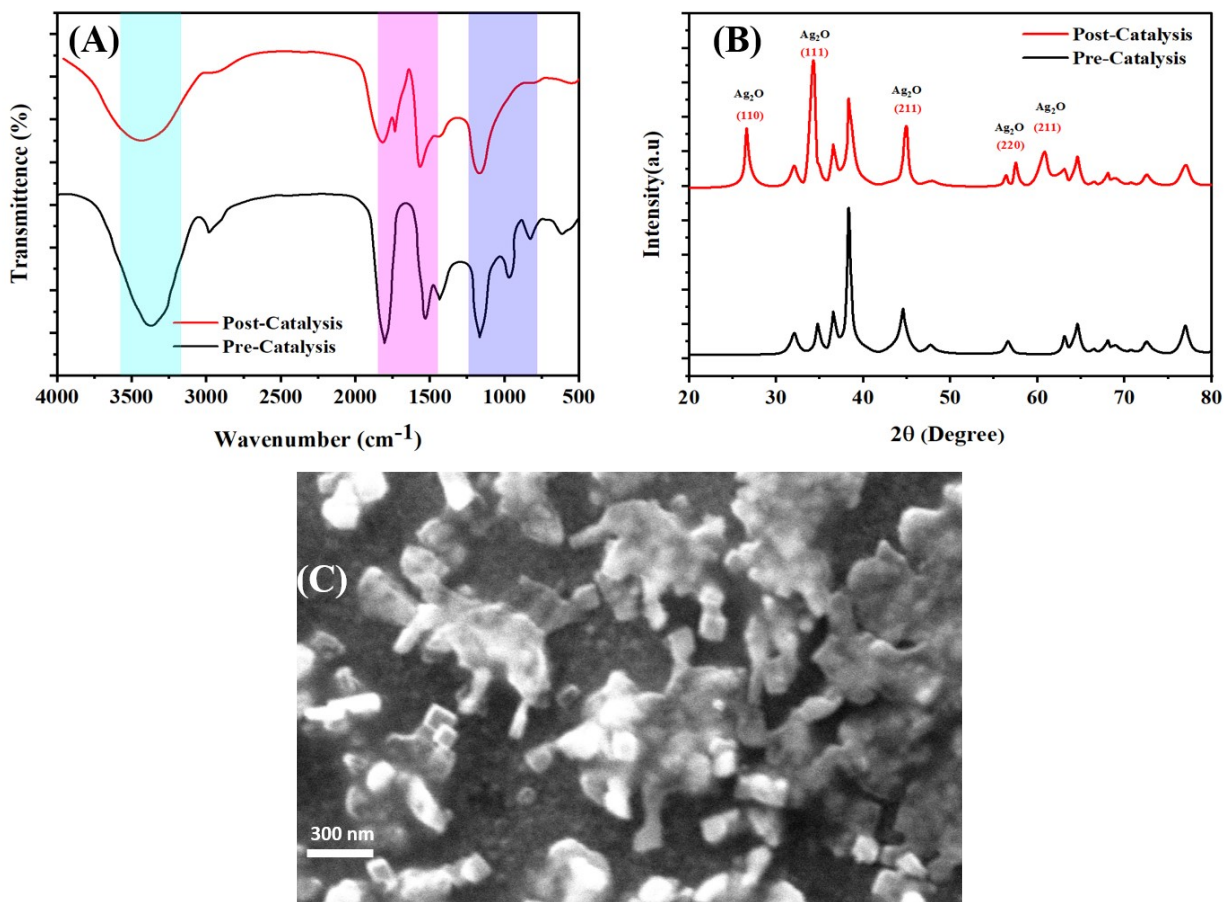

**Fig. S3.** Post HER (A) FTIR, (B) XRD, and (C) SEM image of the catalyst

The data supporting this article (UV-Vis, XRD, FTIR, and TGA) can be accessed through the link [10.6084/m9.figshare.31869334](https://doi.org/10.6084/m9.figshare.31869334).
